# Supplementary material for: Several Critical Cell Types, Tissues, and Pathways Are Implicated in Genome-Wide Association Studies for Systemic Lupus Erythematosus
Source: Oxford University Press journal article supplement (doi:10.1534/g3.116.027326), 2016-06-01

**Figure S1A.** The cell enrichment of SLE genes implicated by 63 SNPs in Eastern Asian population within 249 cell types expression matrix for mus musculus. *The bottom indicates the log transformed p value. The vertical line indicated the Bonferroni-corrected significance criteria. The cell types are listed in the right.*

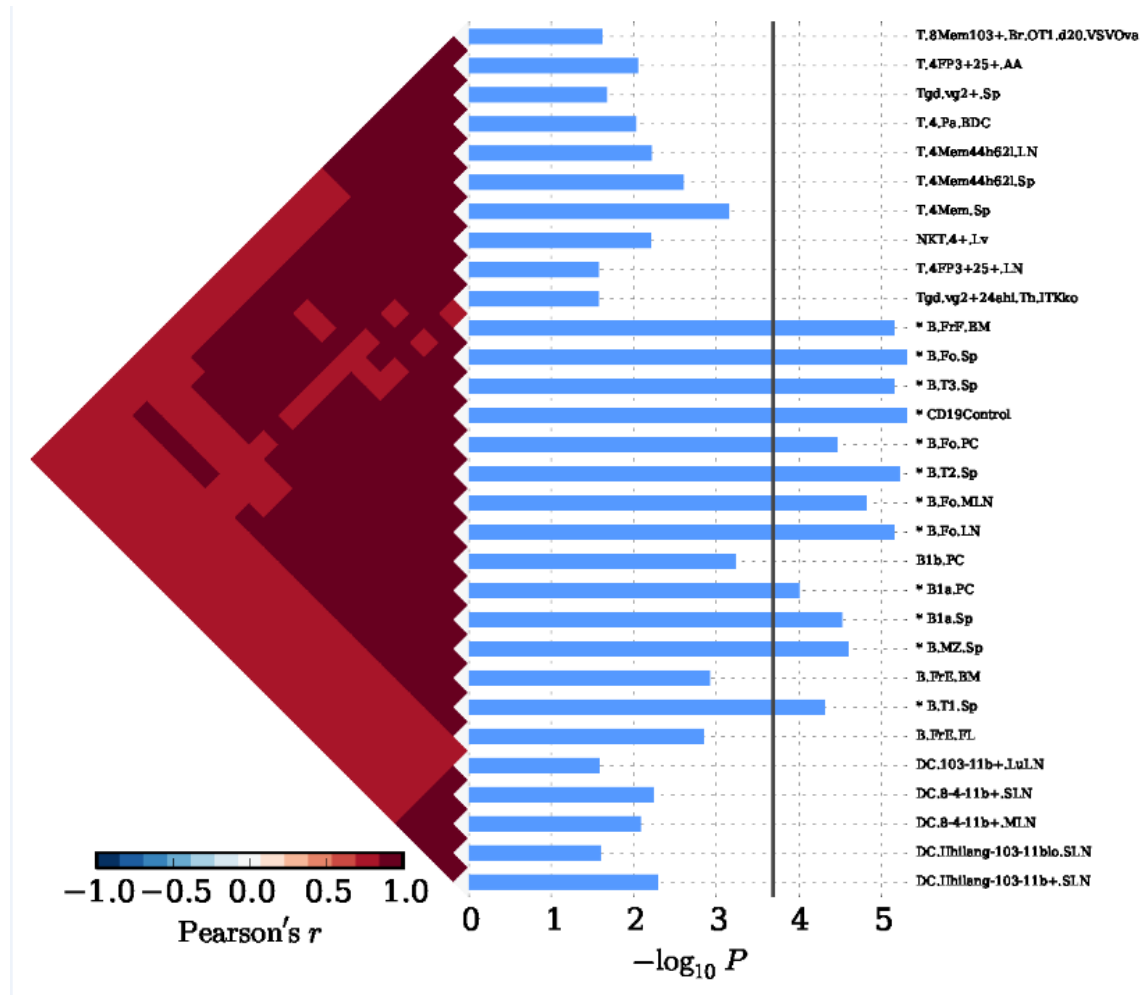

**Figure S1B.** The cell enrichment of SLE implicated genes by 118 SNPs in Caucasian population within 249 cell types expression matrix for mus musculus. *The bottom indicates the log transformed p value. The vertical line indicated the Bonferroni-corrected significance criteria. The cell types are listed in the right.*

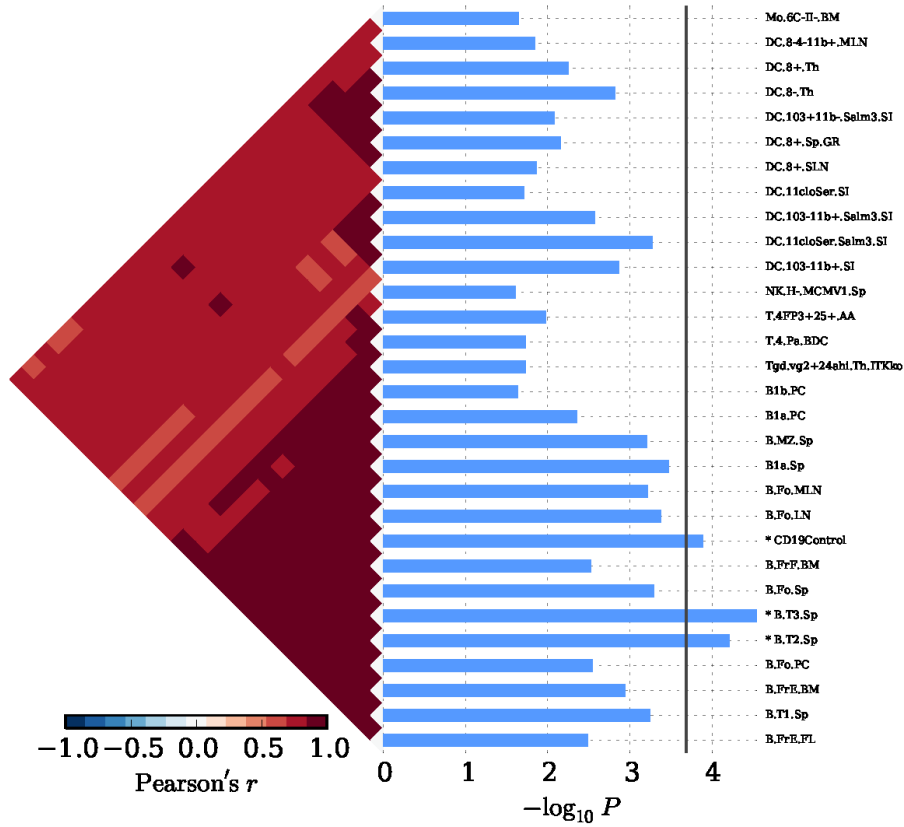

**Figure S1C.** The cell enrichment of SLE implicated gene by 105 SNPs without HLA region SNPs in Caucasian population within 249 cell types expression matrix for mus musculus. *The bottom indicates the log transformed p value. The vertical line indicated the Bonferroni-corrected significance criteria. The cell types are listed in the right.*

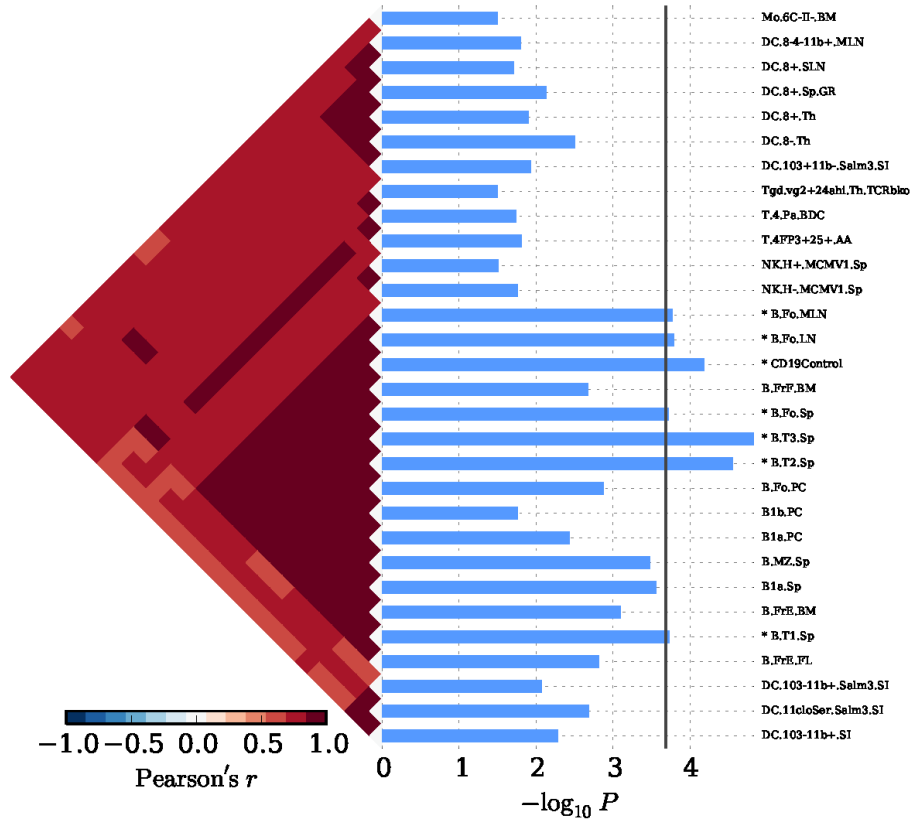

Supplement: 027326_figures1.pdf [file 027326_figures1.pdf]
