# Supplementary material for: Several Critical Cell Types, Tissues, and Pathways Are Implicated in Genome-Wide Association Studies for Systemic Lupus Erythematosus
Source: Oxford University Press journal article supplement (doi:10.1534/g3.116.027326), 2016-06-01

**Figure S2A.** The pathway enrichment of SLE genes implicated by 63 SNPs in Eastern Asian population within 1,751 Gene Expression Ontology matrix. *The bottom indicates the log transformed p value. The vertical line indicated the Bonferroni-corrected significance criteria. The pathways codes and names are listed in the right.*

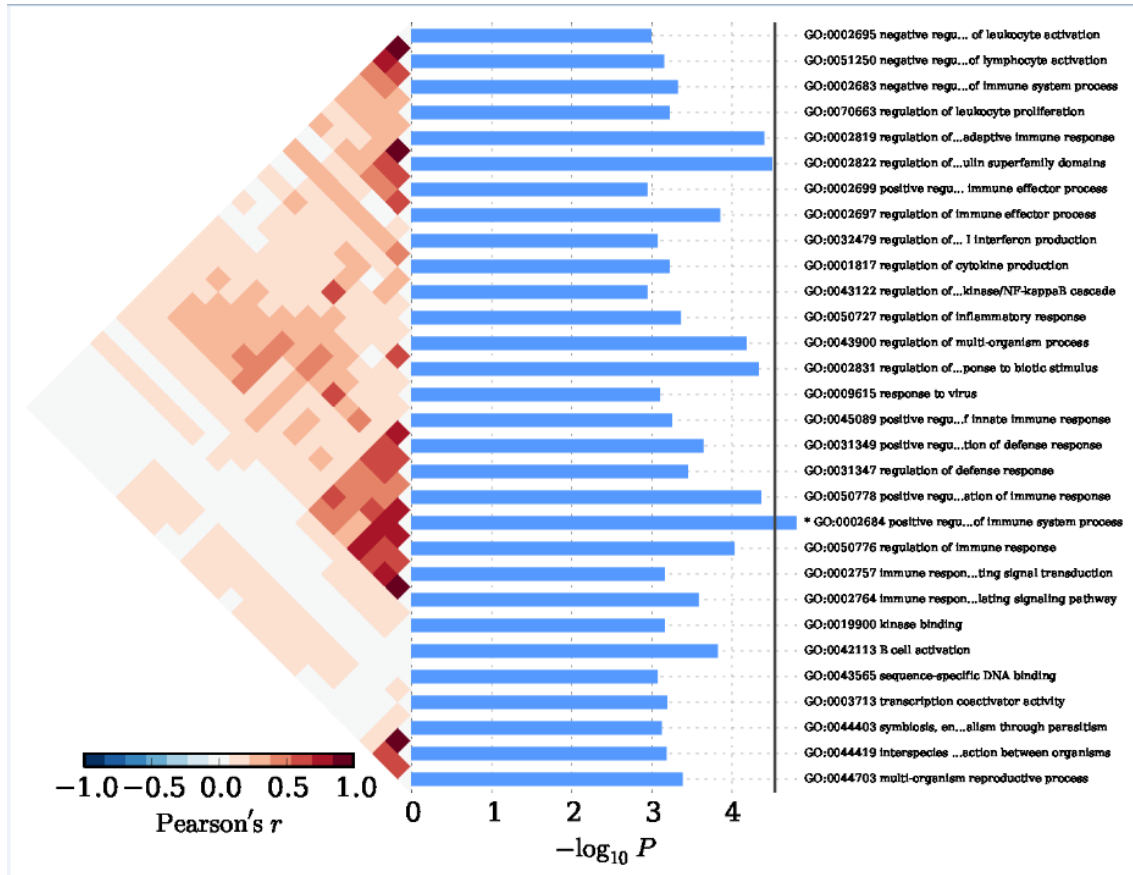

**Figure S2B.** The pathway enrichment of SLE implicated genes by 118 SNPs in Caucasian population within 1,751 Gene Expression Ontology matrix. *The bottom indicates the log transformed p value. The vertical line indicated the Bonferroni-corrected significance criteria. The pathways codes and names are listed in the right.*

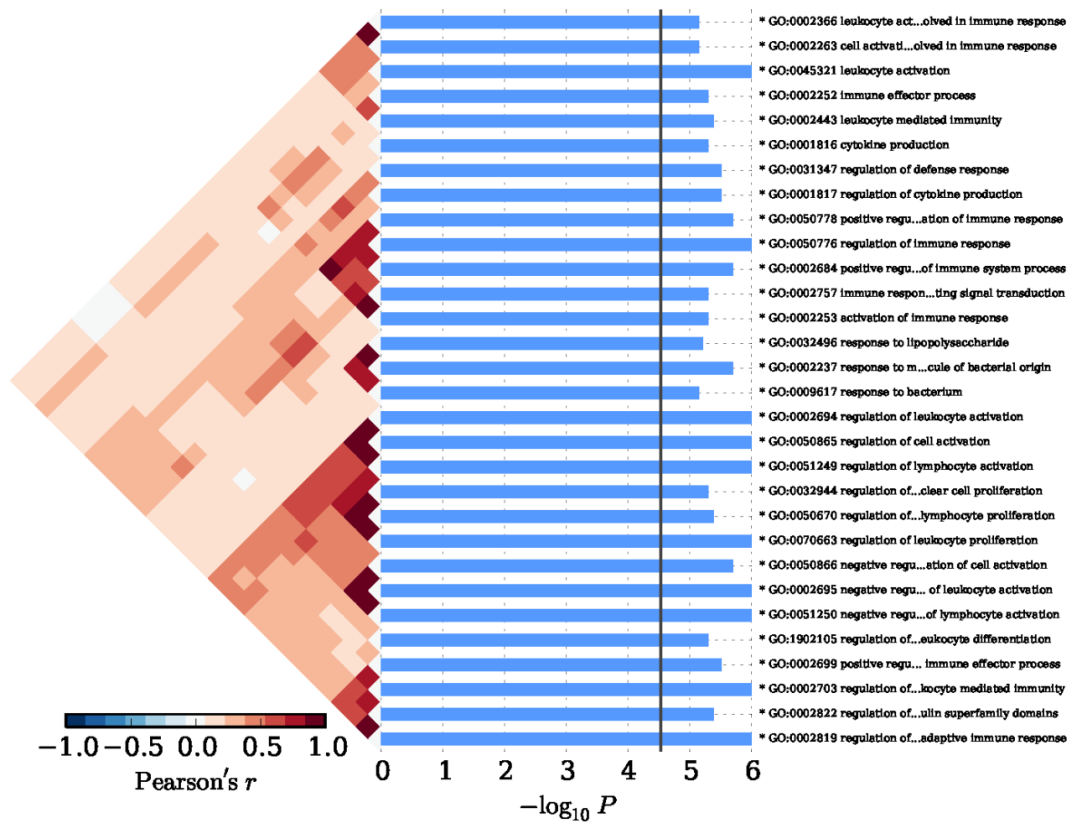

**Figure S2C.** The pathway enrichment of SLE implicated gene by 105 SNPs, without HLA region SNPs in Caucasian population within 1,751 Gene Expression Ontology matrix. *The bottom indicates the log transformed p value. The vertical line indicated the Bonferroni-corrected significance criteria. The pathways codes and names are listed in the right.*

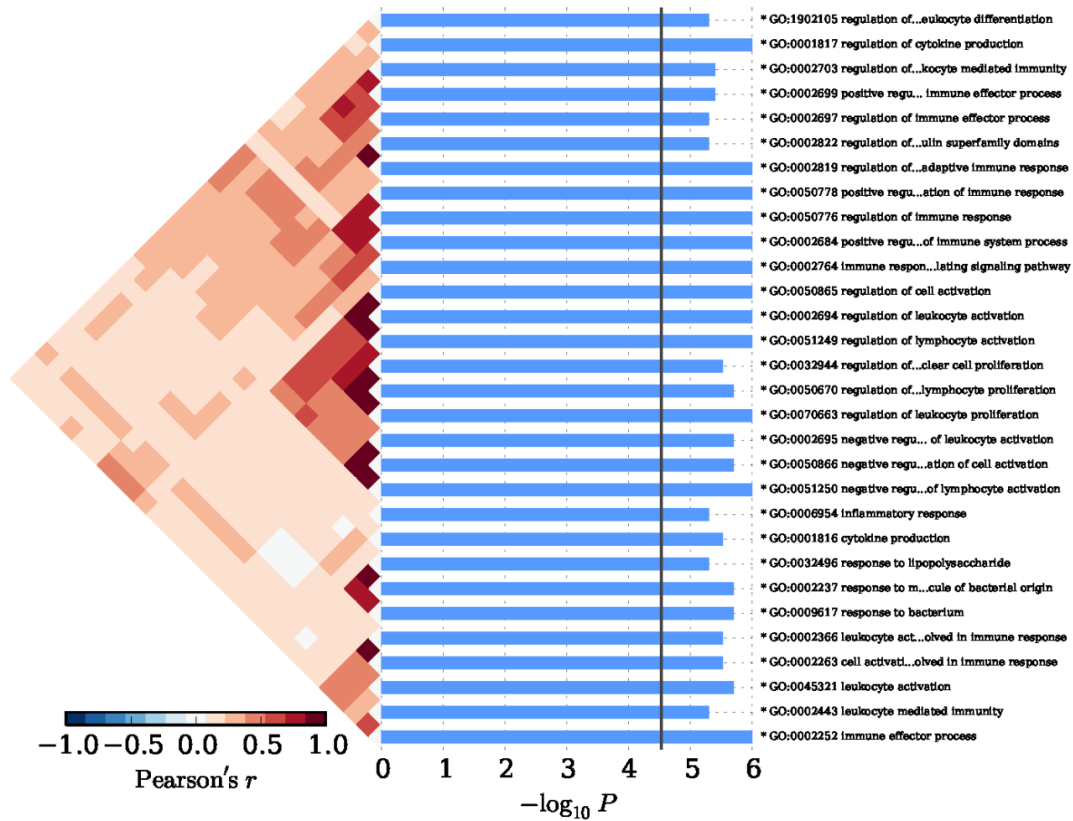

Supplement: 027326_figures2.pdf [file 027326_figures2.pdf]
