# Supplementary material for: Several Critical Cell Types, Tissues, and Pathways Are Implicated in Genome-Wide Association Studies for Systemic Lupus Erythematosus
Source: Oxford University Press journal article supplement (doi:10.1534/g3.116.027326), 2016-06-01
Supplement: 027326_tables3.pdf [file 027326_tables3.pdf]

**Table S3.** The cell enrichment of SLE implicated genes within 249 cell types expression matrix for mus musculus. *The cells filled in yellow mean the P values passing the Bonferroni-corrected significance criteria ( $P \leq 2.01 \times 10^{-4}$ ).*

| Condition   | Eastern Asian | Caucasian | Caucasian<br>without HLA region |
|-------------|---------------|-----------|---------------------------------|
| B.T1.Sp     | 4.88E-05      | 5.68E-04  | 1.86E-04                        |
| B.T2.Sp     | 6.00E-06      | 6.23E-05  | 2.80E-05                        |
| B.T3.Sp     | 7.00E-06      | 2.90E-05  | 1.50E-05                        |
| B.Fo.Sp     | 5.00E-06      | 5.08E-04  | 1.91E-04                        |
| B.MZ.Sp     | 2.50E-05      | 6.26E-04  | 3.32E-04                        |
| B1a.Sp      | 3.00E-05      | 3.42E-04  | 2.74E-04                        |
| B.FrF.BM    | 7.00E-06      | 2.99E-03  | 2.13E-03                        |
| B.Fo.MLN    | 1.50E-05      | 6.07E-04  | 1.71E-04                        |
| B.Fo.LN     | 7.00E-06      | 4.20E-04  | 1.61E-04                        |
| B.Fo.PC     | 3.42E-05      | 2.83E-03  | 1.33E-03                        |
| B1a.PC      | 1.00E-04      | 4.44E-03  | 3.70E-03                        |
| CD19Control | 5.00E-06      | 1.29E-04  | 6.59E-05                        |
