# Supplementary material for: Several Critical Cell Types, Tissues, and Pathways Are Implicated in Genome-Wide Association Studies for Systemic Lupus Erythematosus
Source: Oxford University Press journal article supplement (doi:10.1534/g3.116.027326), 2016-06-01
Supplement: 027326_tables5.pdf [file 027326_tables5.pdf]

**Table S5.** The pathway enrichment of SLE implicated genes within 1,751 Gene Expression Ontology matrix. *The cells filled in yellow mean the P values passing the Bonferroni-corrected significance criteria ( $P \leq 2.86 \times 10^{-5}$ ).*

| GO Pathway                                                                                                                                         | Eastern Asian | Caucasian | Caucasian without HLA region |
|----------------------------------------------------------------------------------------------------------------------------------------------------|---------------|-----------|------------------------------|
| GO:0001816 cytokine production                                                                                                                     | 2.20E-02      | 5.00E-06  | 3.00E-06                     |
| GO:0001817 regulation of cytokine production                                                                                                       | 6.07E-04      | 3.00E-06  | 1.00E-06                     |
| GO:0001818 negative regulation of cytokine production                                                                                              | 2.68E-03      | 8.00E-06  | 8.00E-06                     |
| GO:0002237 response to molecule of bacterial origin                                                                                                | 5.87E-03      | 2.00E-06  | 2.00E-06                     |
| GO:0002252 immune effector process                                                                                                                 | 3.31E-03      | 5.00E-06  | 1.00E-06                     |
| GO:0002253 activation of immune response                                                                                                           | 1.49E-03      | 5.00E-06  | 1.10E-05                     |
| GO:0002263 cell activation involved in immune response                                                                                             | 1.29E-02      | 7.00E-06  | 3.00E-06                     |
| GO:0002366 leukocyte activation involved in immune response                                                                                        | 1.19E-02      | 7.00E-06  | 3.00E-06                     |
| GO:0002443 leukocyte mediated immunity                                                                                                             | 1.79E-01      | 4.00E-06  | 5.00E-06                     |
| GO:0002684 positive regulation of immune system process                                                                                            | 1.60E-05      | 2.00E-06  | 1.00E-06                     |
| GO:0002694 regulation of leukocyte activation                                                                                                      | 1.69E-03      | 1.00E-06  | 1.00E-06                     |
| GO:0002695 negative regulation of leukocyte activation                                                                                             | 1.02E-03      | 1.00E-06  | 2.00E-06                     |
| GO:0002696 positive regulation of leukocyte activation                                                                                             | 2.20E-03      | 1.40E-05  | 1.40E-05                     |
| GO:0002697 regulation of immune effector process                                                                                                   | 1.42E-04      | 7.00E-06  | 5.00E-06                     |
| GO:0002699 positive regulation of immune effector process                                                                                          | 1.14E-03      | 3.00E-06  | 4.00E-06                     |
| GO:0002703 regulation of leukocyte mediated immunity                                                                                               | 8.09E-03      | 1.00E-06  | 4.00E-06                     |
| GO:0002757 immune response-activating signal transduction                                                                                          | 6.85E-04      | 5.00E-06  | 9.00E-06                     |
| GO:0002764 immune response-regulating signaling pathway                                                                                            | 2.64E-04      | 9.00E-06  | 1.00E-06                     |
| GO:0002819 regulation of adaptive immune response                                                                                                  | 4.03E-05      | 1.00E-06  | 1.00E-06                     |
| GO:0002822 regulation of adaptive immune response based on somatic recombination of immune receptors built from immunoglobulin superfamily domains | 3.17E-05      | 4.00E-06  | 5.00E-06                     |
| GO:0006954 inflammatory response                                                                                                                   | 1.35E-02      | 2.10E-05  | 5.00E-06                     |
| GO:0009617 response to bacterium                                                                                                                   | 2.86E-02      | 7.00E-06  | 2.00E-06                     |
| GO:0031347 regulation of defense response                                                                                                          | 3.52E-04      | 3.00E-06  | 7.00E-06                     |

|                                                              |          |          |          |
|--------------------------------------------------------------|----------|----------|----------|
| GO:0031349 positive regulation of defense response           | 2.30E-04 | 3.30E-05 | 2.60E-05 |
| GO:0032496 response to lipopolysaccharide                    | 4.40E-02 | 6.00E-06 | 5.00E-06 |
| GO:0032944 regulation of mononuclear cell proliferation      | 5.24E-03 | 5.00E-06 | 3.00E-06 |
| GO:0045087 innate immune response                            | 3.13E-02 | 1.20E-05 | 5.00E-06 |
| GO:0045321 leukocyte activation                              | 2.39E-03 | 1.00E-06 | 2.00E-06 |
| GO:0050670 regulation of lymphocyte proliferation            | 6.82E-03 | 4.00E-06 | 2.00E-06 |
| GO:0050776 regulation of immune response                     | 9.28E-05 | 1.00E-06 | 1.00E-06 |
| GO:0050778 positive regulation of immune response            | 4.40E-05 | 2.00E-06 | 1.00E-06 |
| GO:0050865 regulation of cell activation                     | 2.28E-03 | 1.00E-06 | 1.00E-06 |
| GO:0050866 negative regulation of cell activation            | 1.29E-03 | 2.00E-06 | 2.00E-06 |
| GO:0050867 positive regulation of cell activation            | 2.60E-03 | 1.90E-05 | 2.80E-05 |
| GO:0051249 regulation of lymphocyte activation               | 6.19E-03 | 1.00E-06 | 1.00E-06 |
| GO:0051250 negative regulation of lymphocyte activation      | 7.04E-04 | 1.00E-06 | 1.00E-06 |
| GO:0051707 response to other organism                        | 3.99E-02 | 5.62E-05 | 2.40E-05 |
| GO:0070663 regulation of leukocyte proliferation             | 6.06E-04 | 1.00E-06 | 1.00E-06 |
| GO:0071219 cellular response to molecule of bacterial origin | 5.71E-03 | 1.50E-05 | 2.10E-05 |
| GO:0071222 cellular response to lipopolysaccharide           | 4.57E-03 | 9.00E-06 | 1.20E-05 |
| GO:1902105 regulation of leukocyte differentiation           | 1.87E-02 | 5.00E-06 | 5.00E-06 |
