# Supplementary material for: Several Critical Cell Types, Tissues, and Pathways Are Implicated in Genome-Wide Association Studies for Systemic Lupus Erythematosus
Source: PubMed Central journal article supplement (PMC4889647; doi:10.1534/g3.116.027326), 2016-03-23

**Figure S4.** The tissue enrichment of SLE implicated gene by 105 SNPs without HLA region SNPs in Caucasian population within 79 tissues expression matrix for homo-sapiens. *The bottom indicates the log transformed p value. The vertical line indicated the Bonferroni-corrected significance criteria. The tissues names are listed in the right.*

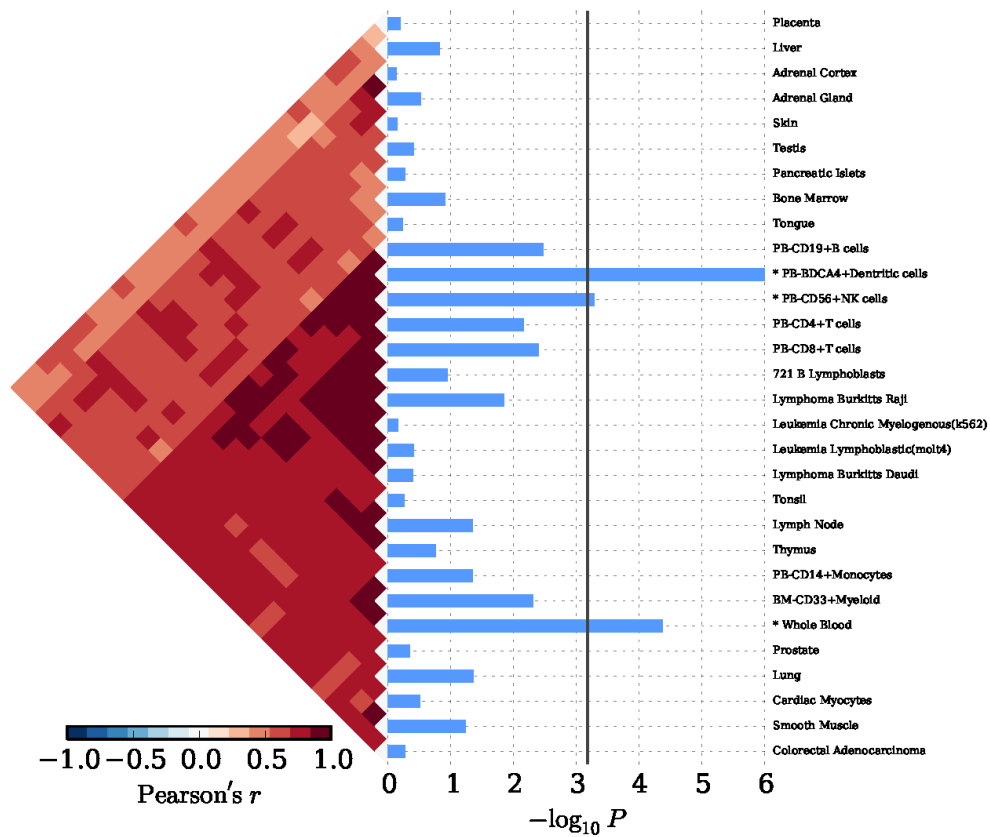

Supplement: supp_g3.116.027326_FigureS4.pdf [file supp_g3.116.027326_FigureS4.pdf]
