# Supplementary material for: Several Critical Cell Types, Tissues, and Pathways Are Implicated in Genome-Wide Association Studies for Systemic Lupus Erythematosus
Source: PubMed Central journal article supplement (PMC4889647; doi:10.1534/g3.116.027326), 2016-03-23
Supplement: supp_g3.116.027326_TableS1.pdf [file supp_g3.116.027326_TableS1.pdf]

**Table S1.** The 181 input SNPs with genome-wide significance for Systemic lupus erythematosus. *Pop*: population, *EAS*: Eastern Asian population; *CEU*: Caucasian population; *SNP*: single-nucleotide polymorphism; *chr*: chromosome; *P-value<sub>combined</sub>*: The associated p value in the combined samples in previous papers; *Ref.*: reference.

| <b>Pop</b> | <b>SNP</b> | <b>position</b> | <b>Chr</b> | <b>P-value<sub>combined</sub></b> | <b>Ref</b>        |
|------------|------------|-----------------|------------|-----------------------------------|-------------------|
| EAS        | rs1234315  | 173178463       | 1q25.1     | $2.34 \times 10^{-26}$            | (Han et al. 2009) |
| EAS        | rs2205960  | 173191475       | 1q25.1     | $2.53 \times 10^{-32}$            | (Han et al. 2009) |
| EAS        | rs13385731 | 33701890        | 2p22.3     | $1.25 \times 10^{-15}$            | (Han et al. 2009) |
| EAS        | rs7574865  | 191964633       | 2q32.3     | $5.17 \times 10^{-42}$            | (Han et al. 2009) |
| EAS        | rs2230926  | 138196066       | 6q23.3     | $1.37 \times 10^{-17}$            | (Han et al. 2009) |
| EAS        | rs4917014  | 50305863        | 7p12.2     | $2.75 \times 10^{-23}$            | (Han et al. 2009) |
| EAS        | rs1167796  | 75173180        | 7q11.23    | $2.12 \times 10^{-08}$            | (Han et al. 2009) |
| EAS        | rs4728142  | 128573967       | 7q32.1     | $8.14 \times 10^{-19}$            | (Han et al. 2009) |
| EAS        | rs7812879  | 11340181        | 8p23.1     | $2.09 \times 10^{-24}$            | (Han et al. 2009) |
| EAS        | rs2618479  | 11355821        | 8p23.1     | $5.26 \times 10^{-21}$            | (Han et al. 2009) |
| EAS        | rs2248932  | 11391650        | 8p23.1     | $1.63 \times 10^{-21}$            | (Han et al. 2009) |
| EAS        | rs1913517  | 50119054        | 10q11.22   | $7.22 \times 10^{-12}$            | (Han et al. 2009) |
| EAS        | rs4639966  | 118573519       | 11q23.3    | $1.25 \times 10^{-16}$            | (Han et al. 2009) |
| EAS        | rs6590330  | 128311059       | 11q24.3    | $1.77 \times 10^{-25}$            | (Han et al. 2009) |
| EAS        | rs10847697 | 129299385       | 12q24.32   | $3.54 \times 10^{-11}$            | (Han et al. 2009) |
| EAS        | rs1385374  | 129300694       | 12q24.32   | $1.77 \times 10^{-11}$            | (Han et al. 2009) |
| EAS        | rs7197475  | 30642867        | 16p11.2    | $2.77 \times 10^{-08}$            | (Han et al. 2009) |
| EAS        | rs463426   | 21809185        | 22q11.21   | $1.48 \times 10^{-16}$            | (Han et al. 2009) |
| EAS        | rs131654   | 21917190        | 22q11.21   | $2.99 \times 10^{-16}$            | (Han et al. 2009) |

|     |            |           |          |                        |                      |
|-----|------------|-----------|----------|------------------------|----------------------|
| EAS | rs16972959 | 23901376  | 16p11.2  | $1.35 \times 10^{-09}$ | (Sheng et al. 2011)  |
| EAS | rs12599402 | 11189888  | 16p13    | $1.34 \times 10^{-8}$  | (Zhang et al. 2011)  |
| EAS | rs8016947  | 35832666  | 14q13    | $1.08 \times 10^{-13}$ | (Li et al. 2013)     |
| EAS | rs4649203  | 24519920  | 1p36     | $9.90 \times 10^{-9}$  | (Li et al. 2013)     |
| EAS | rs6705628  | 74208362  | 2p13     | $6.9 \times 10^{-17}$  | (Yang et al. 2013)   |
| EAS | rs4852324  | 74202578  | 2p13     | $5.7 \times 10^{-14}$  | (Yang et al. 2013)   |
| EAS | rs6804441  | 119260944 | 3q13     | $2.5 \times 10^{-16}$  | (Yang et al. 2013)   |
| EAS | rs4948496  | 63805617  | 10q21    | $5.1 \times 10^{-11}$  | (Yang et al. 2013)   |
| EAS | rs12822507 | 12773521  | 12p13    | $2.2 \times 10^{-8}$   | (Yang et al. 2013)   |
| EAS | rs10845606 | 12834894  | 12p13    | $3.8 \times 10^{-17}$  | (Yang et al. 2013)   |
| EAS | rs34330    | 12870695  | 12p13    | $4.8 \times 10^{-12}$  | (Yang et al. 2013)   |
| EAS | rs4622329  | 102321935 | 12p23    | $9.4 \times 10^{-12}$  | (Yang et al. 2013)   |
| EAS | rs906868   | 30448344  | 2p23.1   | $7.71 \times 10^{-10}$ | (Yu et al. 2013)     |
| EAS | rs7579944  | 30445026  | 2p23.1   | $5.55 \times 10^{-9}$  | (Yu et al. 2013)     |
| EAS | rs11603023 | 118486067 | 11q23.3  | $1.25 \times 10^{-08}$ | (Zhang et al. 2014)  |
| EAS | rs10892301 | 118735476 | 11q23.3  | $2.51 \times 10^{-08}$ | (Zhang et al. 2014)  |
| EAS | rs7601754  | 191940451 | 2q32.3   | $1.39 \times 10^{-9}$  | (Yang et al. 2009)   |
| EAS | rs17266594 | 102750922 | 4q24     | $4.67 \times 10^{-9}$  | (Chang et al. 2009)  |
| EAS | rs1128334  | 128328959 | 11q24.3  | $2.33 \times 10^{-11}$ | (Yang et al. 2010)   |
| EAS | rs7097397  | 50025396  | 10q11.23 | $8.15 \times 10^{-12}$ | (Yang et al. 2010)   |
| EAS | rs10168266 | 191935804 | 2q32.3   | $2.17 \times 10^{-8}$  | (Yang et al. 2010)   |
| EAS | rs9271366  | 32586854  | 6p21.32  | $7.67 \times 10^{-10}$ | (Yang et al. 2010)   |
| EAS | rs7329174  | 41558110  | 13q14.11 | $1.47 \times 10^{-8}$  | (Yang et al. 2011)   |
| EAS | rs548234   | 106568034 | 6q21     | $1.28 \times 10^{-16}$ | (Zhou et al. 2011)   |
| EAS | rs2222631  | 119272391 | 3q13.33  | $4.50 \times 10^{-8}$  | (Zhang et al. 2015c) |
| EAS | rs2298428  | 21982892  | 22q11.21 | $3.16 \times 10^{-9}$  | (Zhang et al. 2015b) |

|     |            |           |          |                         |                                                                         |
|-----|------------|-----------|----------|-------------------------|-------------------------------------------------------------------------|
| EAS | rs1418190  | 173361979 | 1q25.1   | $1.08 \times 10^{-08}$  | (Sheng et al. 2015)                                                     |
| EAS | rs4916219  | 173373183 | 1q25     | $7.77 \times 10^{-09}$  | (Sheng et al. 2015)                                                     |
| EAS | rs2934498  | 85968282  | 16q24.1  | $4.97 \times 10^{-09}$  | (Sheng et al. 2015)                                                     |
| EAS | rs2431697  | 159879978 | 5q34     | $1.15 \times 10^{-22}$  | (Sheng et al. 2015)                                                     |
| EAS | rs2732547  | 35088683  | 11p13    | $1.55 \times 10^{-11}$  | (Sheng et al. 2015)                                                     |
| EAS | rs12494314 | 119122820 | 3q13.33  | $1.01 \times 10^{-09}$  | (Sheng et al. 2015)                                                     |
| EAS | rs13205210 | 34831856  | 6p21.31  | $5.51 \times 10^{-12}$  | (Zhang et al. 2015a)                                                    |
| EAS | rs10036748 | 150458146 | 5q33.1   | $1.94 \times 10^{-10}$  | (Zhang et al. 2015a)                                                    |
| EAS | rs73366469 | 74033600  | 7q11.23  | $3.75 \times 10^{-117}$ | (Sun et al. 2016)                                                       |
| EAS | rs10807150 | 35272274  | 6p21.31  | $6.06 \times 10^{-16}$  | (Sun et al. 2016)                                                       |
| EAS | rs2421184  | 158886939 | 5q33.3   | $4.67 \times 10^{-12}$  | (Sun et al. 2016)                                                       |
| EAS | rs7726414  | 133431834 | 5q31.1   | $1.13 \times 10^{-11}$  | (Sun et al. 2016)                                                       |
| EAS | rs7726159  | 1282319   | 5p15.33  | $2.11 \times 10^{-11}$  | (Sun et al. 2016)                                                       |
| EAS | rs1610555  | 67543147  | 18q22.2  | $4.50 \times 10^{-11}$  | (Sun et al. 2016)                                                       |
| EAS | rs2009453  | 65399528  | 11q13.1  | $9.61 \times 10^{-11}$  | (Sun et al. 2016)                                                       |
| EAS | rs12900339 | 38927386  | 15q14    | $4.73 \times 10^{-10}$  | (Sun et al. 2016)                                                       |
| EAS | rs61616683 | 39755773  | 22q13.1  | $5.73 \times 10^{-10}$  | (Sun et al. 2016)                                                       |
| EAS | rs2305772  | 52033742  | 19q13.41 | $1.34 \times 10^{-9}$   | (Sun et al. 2016)                                                       |
| CEU | rs13277113 | 11349186  | 8p21.3   | $1 \times 10^{-10}$     | (Hom et al. 2008)                                                       |
| CEU | rs11574637 | 31368874  | 16p11.2  | $3 \times 10^{-11}$     | (Hom et al. 2008)                                                       |
| CEU | rs3131379  | 31721033  | 6p21.33  | $1.71 \times 10^{-52}$  | (International Consortium for Systemic Lupus Erythematosus et al. 2008) |
| CEU | rs9888739  | 31313253  | 16pll.2  | $1.61 \times 10^{-23}$  | (International Consortium for Systemic Lupus Erythematosus et al. 2008) |
| CEU | rs1143678  | 31343005  | 16pll.2  | $8.5 \times 10^{-14}$   | (International Consortium for Systemic Lupus Erythematosus et al. 2008) |
| CEU | rs4548893  | 31364493  | 16pll.2  | $2.36 \times 10^{-12}$  | (International Consortium for Systemic Lupus Erythematosus et al. 2008) |
| CEU | rs729302   | 128568960 | 7q32.1   | $2 \times 10^{-10}$     | (International Consortium for Systemic Lupus Erythematosus et al. 2008) |
| CEU | rs10279821 | 128683547 | 7q32.1   | $6.5 \times 10^{-9}$    | (International Consortium for Systemic Lupus Erythematosus et al. 2008) |

|     |            |           |          |                        |                                                                         |
|-----|------------|-----------|----------|------------------------|-------------------------------------------------------------------------|
| CEU | rs12537284 | 128717906 | 7q32.1   | $3.61 \times 10^{-19}$ | (International Consortium for Systemic Lupus Erythematosus et al. 2008) |
| CEU | rs4963128  | 589564    | 11p15.5  | $3.00 \times 10^{-10}$ | (International Consortium for Systemic Lupus Erythematosus et al. 2008) |
| CEU | rs6445975  | 58370177  | 3p14.3   | $7.10 \times 10^{-09}$ | (International Consortium for Systemic Lupus Erythematosus et al. 2008) |
| CEU | rs10239340 | 128668510 | 7q32.1   | $6.98 \times 10^{-16}$ | (International Consortium for Systemic Lupus Erythematosus et al. 2008) |
| CEU | rs6985109  | 10761585  | 8p23.1   | $2.51 \times 10^{-11}$ | (International Consortium for Systemic Lupus Erythematosus et al. 2008) |
| CEU | rs4240671  | 10767748  | 8p23.1   | $6.6 \times 10^{-9}$   | (International Consortium for Systemic Lupus Erythematosus et al. 2008) |
| CEU | rs11783247 | 10788875  | 8p23.1   | $8.00 \times 10^{-10}$ | (International Consortium for Systemic Lupus Erythematosus et al. 2008) |
| CEU | rs6984496  | 10796093  | 8p23.1   | $2.00 \times 10^{-10}$ | (International Consortium for Systemic Lupus Erythematosus et al. 2008) |
| CEU | rs7836059  | 11272164  | 8p23.1   | $4 \times 10^{-10}$    | (International Consortium for Systemic Lupus Erythematosus et al. 2008) |
| CEU | rs2248932  | 11391650  | 8p23.1   | $7 \times 10^{-10}$    | (International Consortium for Systemic Lupus Erythematosus et al. 2008) |
| CEU | rs7829816  | 56849386  | 8q12.1   | $5.4 \times 10^{-9}$   | (International Consortium for Systemic Lupus Erythematosus et al. 2008) |
| CEU | rs2667978  | 56897951  | 8q12.1   | $5.1 \times 10^{-8}$   | (International Consortium for Systemic Lupus Erythematosus et al. 2008) |
| CEU | rs5754217  | 21939675  | 22q11.21 | $7.53 \times 10^{-8}$  | (International Consortium for Systemic Lupus Erythematosus et al. 2008) |
| CEU | rs7775397  | 32261252  | 6p21.32  | $8.0 \times 10^{-47}$  | (International Consortium for Systemic Lupus Erythematosus et al. 2008) |
| CEU | rs9275572  | 32678999  | 6p21.32  | $7.0 \times 10^{-48}$  | (International Consortium for Systemic Lupus Erythematosus et al. 2008) |
| CEU | rs1794282  | 32666526  | 6p21.32  | $2.6 \times 10^{-46}$  | (International Consortium for Systemic Lupus Erythematosus et al. 2008) |
| CEU | rs7192     | 32411646  | 6p21.32  | $6.2 \times 10^{-40}$  | (International Consortium for Systemic Lupus Erythematosus et al. 2008) |
| CEU | rs10516487 | 102751076 | 4q24     | $3.74 \times 10^{-10}$ | (Kozyrev et al. 2008)                                                   |
| CEU | rs17266594 | 102750922 | 4q24     | $4.74 \times 10^{-11}$ | (Kozyrev et al. 2008)                                                   |
| CEU | rs5029939  | 138195723 | 6q23.3   | $2.89 \times 10^{-12}$ | (Graham et al. 2008)                                                    |
| CEU | rs3821236  | 191902758 | 2q32.3   | $8.49 \times 10^{-11}$ | (Graham et al. 2008)                                                    |
| CEU | rs2618476  | 11352541  | 8p23.1   | $1.70 \times 10^{-8}$  | (Graham et al. 2008)                                                    |
| CEU | rs3135394  | 32408497  | 6p21.32  | $2.0 \times 10^{-60}$  | (Gateva et al. 2009)                                                    |
| CEU | rs7574865  | 191964633 | 2q32.3   | $1.4 \times 10^{-41}$  | (Gateva et al. 2009)                                                    |
| CEU | rs2070197  | 128589000 | 7q32.1   | $5.8 \times 10^{-24}$  | (Gateva et al. 2009)                                                    |
| CEU | rs11860650 | 31326706  | 16p11.2  | $1.9 \times 10^{-20}$  | (Gateva et al. 2009)                                                    |

|     |            |           |         |                        |                                  |
|-----|------------|-----------|---------|------------------------|----------------------------------|
| CEU | rs5029937  | 138195151 | 6q23.3  | $5.3 \times 10^{-13}$  | (Gateva et al. 2009)             |
| CEU | rs2205960  | 173191475 | 1q25.1  | $6.3 \times 10^{-9}$   | (Gateva et al. 2009)             |
| CEU | rs7708392  | 150457485 | 5q33.1  | $3.8 \times 10^{-13}$  | (Gateva et al. 2009)             |
| CEU | rs11755393 | 34824636  | 6p21.31 | $2.2 \times 10^{-8}$   | (Gateva et al. 2009)             |
| CEU | rs2732552  | 35084592  | 11p13   | $1.82 \times 10^{-9}$  | (Lessard et al. 2011)            |
| CEU | rs387619   | 35098193  | 11p13   | $1.46 \times 10^{-8}$  | (Lessard et al. 2011)            |
| CEU | rs2301271  | 32725193  | 6p21.32 | $2.00 \times 10^{-12}$ | (Chung et al. 2011)              |
| CEU | rs10911363 | 183549757 | 1q25.3  | $2.87 \times 10^{-11}$ | (Cunninghame Graham et al. 2011) |
| CEU | rs2366293  | 50227828  | 7p12.2  | $2.33 \times 10^{-9}$  | (Cunninghame Graham et al. 2011) |
| CEU | rs2280381  | 86018633  | 16q24.1 | $1.24 \times 10^{-8}$  | (Cunninghame Graham et al. 2011) |
| CEU | rs1990760  | 163124051 | 2q24.2  | $1.63 \times 10^{-8}$  | (Cunninghame Graham et al. 2011) |
| CEU | rs280519   | 10472933  | 19p13.2 | $3.88 \times 10^{-8}$  | (Cunninghame Graham et al. 2011) |
| CEU | rs1269852  | 32080191  | 6p21.33 | $2.48 \times 10^{-19}$ | (Fernando et al. 2012)           |
| CEU | rs3906272  | 31262924  | 6p21.33 | $2.95 \times 10^{-10}$ | (Fernando et al. 2012)           |
| CEU | rs11648084 | 85972598  | 16q24.1 | $2.34 \times 10^{-9}$  | (Lessard et al. 2012)            |
| CEU | rs9936079  | 85967594  | 16q24.1 | $3.96 \times 10^{-9}$  | (Lessard et al. 2012)            |
| CEU | rs4843865  | 85969305  | 16q24.1 | $2.93 \times 10^{-8}$  | (Lessard et al. 2012)            |
| CEU | rs11347703 | 85969641  | 16q24.1 | $1.11 \times 10^{-8}$  | (Lessard et al. 2012)            |
| CEU | rs11117422 | 85972013  | 16q24.1 | $9.37 \times 10^{-9}$  | (Lessard et al. 2012)            |
| CEU | rs13335265 | 85972810  | 16q24.1 | $1.23 \times 10^{-8}$  | (Lessard et al. 2012)            |
| CEU | rs12711490 | 85973028  | 16q24.1 | $2.11 \times 10^{-8}$  | (Lessard et al. 2012)            |
| CEU | rs11641153 | 85973140  | 16q24.1 | $1.31 \times 10^{-9}$  | (Lessard et al. 2012)            |
| CEU | rs11641155 | 85973152  | 16q24.1 | $1.23 \times 10^{-9}$  | (Lessard et al. 2012)            |
| CEU | rs7205434  | 85973195  | 16q24.1 | $1.23 \times 10^{-9}$  | (Lessard et al. 2012)            |
| CEU | rs4843868  | 85973401  | 16q24.1 | $8.57 \times 10^{-10}$ | (Lessard et al. 2012)            |
| CEU | rs4843323  | 85974961  | 16q24.1 | $7.71 \times 10^{-10}$ | (Lessard et al. 2012)            |

|     |            |           |          |                        |                             |
|-----|------------|-----------|----------|------------------------|-----------------------------|
| CEU | rs4843869  | 85975141  | 16q24.1  | $7.61 \times 10^{-10}$ | (Lessard et al. 2012)       |
| CEU | rs7202472  | 85977502  | 16q24.1  | $7.25 \times 10^{-9}$  | (Lessard et al. 2012)       |
| CEU | rs2051549  | 32730086  | 6p21.32  | $3.36 \times 10^{-22}$ | (Lee et al. 2012)           |
| CEU | rs12531711 | 128617466 | 7q32.1   | $6.41 \times 10^{-13}$ | (Lee et al. 2012)           |
| CEU | rs12680762 | 11332026  | 8p23.1   | $1.45 \times 10^{-8}$  | (Lee et al. 2012)           |
| CEU | rs10931481 | 191954852 | 2q32.3   | $1.74 \times 10^{-8}$  | (Lee et al. 2012)           |
| CEU | rs2275247  | 35908451  | 1p34.3   | $1.4 \times 10^{-10}$  | (Martin et al. 2013)        |
| CEU | rs2176082  | 58331186  | 3p14.3   | $5.24 \times 10^{-11}$ | (Martin et al. 2013)        |
| CEU | rs1635852  | 28189411  | 7p15.1   | $1.6 \times 10^{-8}$   | (Martin et al. 2013)        |
| CEU | rs10911628 | 184649503 | 1q25.3   | $2.3 \times 10^{-13}$  | (Armstrong et al. 2014)     |
| CEU | rs4728142  | 128573967 | 7q32.1   | $7.1 \times 10^{-10}$  | (Armstrong et al. 2014)     |
| CEU | rs11073328 | 38764843  | 15q14    | $9.9 \times 10^{-15}$  | (Armstrong et al. 2014)     |
| CEU | rs8023715  | 97607681  | 15q26.2  | $1.2 \times 10^{-8}$   | (Armstrong et al. 2014)     |
| CEU | rs11697848 | 48575315  | 20q13.13 | $1.4 \times 10^{-11}$  | (Armstrong et al. 2014)     |
| CEU | rs7897633  | 52957721  | 10q21.1  | $2.75 \times 10^{-8}$  | (Kariuki et al. 2015)       |
| CEU | rs6445972  | 58321707  | 3p14.3   | $4.62 \times 10^{-10}$ | (Vaughn et al. 2014)        |
| CEU | rs10506216 | 43130885  | 12q12    | $3.08 \times 10^{-8}$  | (Demirci et al. 2015)       |
| CEU | rs1143679  | 31276811  | 16p11.2  | $1.1 \times 10^{-16}$  | (Suarez-Gestal et al. 2009) |
| CEU | rs2476601  | 114377568 | 1p13.2   | $1.10 \times 10^{-28}$ | (Bentham et al. 2015)       |
| CEU | rs1801274  | 161479745 | 1q23.3   | $1.04 \times 10^{-12}$ | (Bentham et al. 2015)       |
| CEU | rs704840   | 173226195 | 1q25.1   | $3.12 \times 10^{-19}$ | (Bentham et al. 2015)       |
| CEU | rs17849501 | 183542323 | 1q25.3   | $3.45 \times 10^{-88}$ | (Bentham et al. 2015)       |
| CEU | rs3024505  | 206939904 | 1q32.1   | $4.64 \times 10^{-9}$  | (Bentham et al. 2015)       |
| CEU | rs9782955  | 236039877 | 1q42.3   | $1.25 \times 10^{-9}$  | (Bentham et al. 2015)       |
| CEU | rs2111485  | 163110536 | 2q24.2   | $1.27 \times 10^{-11}$ | (Bentham et al. 2015)       |

|     |            |           |          |                         |                       |
|-----|------------|-----------|----------|-------------------------|-----------------------|
| CEU | rs11889341 | 191943742 | 2q32.3   | $5.59 \times 10^{-122}$ | (Bentham et al. 2015) |
| CEU | rs3768792  | 213871709 | 2q34     | $1.21 \times 10^{-13}$  | (Bentham et al. 2015) |
| CEU | rs9311676  | 58470351  | 3p14.3   | $3.06 \times 10^{-14}$  | (Bentham et al. 2015) |
| CEU | rs564799   | 159728987 | 3q25.33  | $1.54 \times 10^{-9}$   | (Bentham et al. 2015) |
| CEU | rs10028805 | 102737250 | 4q24     | $4.31 \times 10^{-17}$  | (Bentham et al. 2015) |
| CEU | rs7726414  | 133431834 | 5q31.1   | $4.44 \times 10^{-16}$  | (Bentham et al. 2015) |
| CEU | rs10036748 | 150458146 | 5q33.1   | $1.27 \times 10^{-45}$  | (Bentham et al. 2015) |
| CEU | rs2431697  | 159879978 | 5q33.3   | $8.01 \times 10^{-28}$  | (Bentham et al. 2015) |
| CEU | rs1270942  | 31918860  | 6p21.33  | $2.25 \times 10^{-165}$ | (Bentham et al. 2015) |
| CEU | rs9462027  | 34797241  | 6p21.31  | $7.55 \times 10^{-9}$   | (Bentham et al. 2015) |
| CEU | rs6568431  | 106588806 | 6q21     | $5.04 \times 10^{-14}$  | (Bentham et al. 2015) |
| CEU | rs6932056  | 138242437 | 6q23.3   | $1.97 \times 10^{-31}$  | (Bentham et al. 2015) |
| CEU | rs849142   | 28185891  | 7p15.1   | $8.61 \times 10^{-11}$  | (Bentham et al. 2015) |
| CEU | rs4917014  | 50305863  | 7p12.2   | $6.39 \times 10^{-14}$  | (Bentham et al. 2015) |
| CEU | rs10488631 | 128594183 | 7q32.1   | $9.37 \times 10^{-110}$ | (Bentham et al. 2015) |
| CEU | rs2736340  | 11343973  | 8p23.1   | $6.28 \times 10^{-20}$  | (Bentham et al. 2015) |
| CEU | rs2663052  | 50069395  | 10q11.23 | $5.25 \times 10^{-9}$   | (Bentham et al. 2015) |
| CEU | rs4948496  | 63805617  | 10q21.2  | $1.04 \times 10^{-10}$  | (Bentham et al. 2015) |
| CEU | rs12802200 | 566936    | 11p15.5  | $8.81 \times 10^{-10}$  | (Bentham et al. 2015) |
| CEU | rs2732549  | 35088399  | 11p13    | $1.20 \times 10^{-23}$  | (Bentham et al. 2015) |
| CEU | rs3794060  | 71187679  | 11q13.4  | $1.32 \times 10^{-20}$  | (Bentham et al. 2015) |
| CEU | rs7941765  | 128499000 | 11q24.3  | $1.35 \times 10^{-10}$  | (Bentham et al. 2015) |
| CEU | rs10774625 | 111910219 | 12q24.12 | $4.09 \times 10^{-9}$   | (Bentham et al. 2015) |
| CEU | rs1059312  | 129278864 | 12q24.32 | $1.48 \times 10^{-13}$  | (Bentham et al. 2015) |
| CEU | rs4902562  | 68731458  | 14q24.1  | $6.15 \times 10^{-10}$  | (Bentham et al. 2015) |
| CEU | rs2289583  | 75311036  | 15q24.2  | $6.22 \times 10^{-15}$  | (Bentham et al. 2015) |
| CEU | rs9652601  | 11174365  | 16p13.13 | $7.42 \times 10^{-17}$  | (Bentham et al. 2015) |

|     |            |          |          |                        |                       |
|-----|------------|----------|----------|------------------------|-----------------------|
| CEU | rs34572943 | 31272353 | 16p11.2  | $3.39 \times 10^{-76}$ | (Bentham et al. 2015) |
| CEU | rs11644034 | 85972612 | 16q24.1  | $9.58 \times 10^{-18}$ | (Bentham et al. 2015) |
| CEU | rs2286672  | 4712617  | 17p13.2  | $2.93 \times 10^{-9}$  | (Bentham et al. 2015) |
| CEU | rs2941509  | 37921194 | 17q12    | $7.98 \times 10^{-9}$  | (Bentham et al. 2015) |
| CEU | rs2304256  | 10475652 | 19p13.2  | $3.50 \times 10^{-13}$ | (Bentham et al. 2015) |
| CEU | rs7444     | 21976934 | 22q11.21 | $1.84 \times 10^{-22}$ | (Bentham et al. 2015) |

---



## References

- Armstrong, D.L., R. Zidovetzki, M.E. Alarcon-Riquelme, B.P. Tsao, L.A. Criswell *et al.*, 2014 GWAS identifies novel SLE susceptibility genes and explains the association of the HLA region. *Genes Immun* 15 (6):347-354.
- Bentham, J., D.L. Morris, D.S. Cunninghame Graham, C.L. Pinder, P. Tomblinson *et al.*, 2015 Genetic association analyses implicate aberrant regulation of innate and adaptive immunity genes in the pathogenesis of systemic lupus erythematosus. *Nat Genet*.
- Chang, Y.K., W. Yang, M. Zhao, C.C. Mok, T.M. Chan *et al.*, 2009 Association of BANK1 and TNFSF4 with systemic lupus erythematosus in Hong Kong Chinese. *Genes Immun* 10 (5):414-420.
- Chung, S.A., K.E. Taylor, R.R. Graham, J. Nititham, A.T. Lee *et al.*, 2011 Differential genetic associations for systemic lupus erythematosus based on anti-dsDNA autoantibody production. *PLoS Genet* 7 (3):e1001323.
- Cunninghame Graham, D.S., D.L. Morris, T.R. Bhangale, L.A. Criswell, A.C. Syvanen *et al.*, 2011 Association of NCF2, IKZF1, IRF8, IFIH1, and TYK2 with systemic lupus erythematosus. *PLoS Genet* 7 (10):e1002341.
- Demirci, F.Y., X. Wang, J.A. Kelly, D.L. Morris, M.M. Barmada *et al.*, 2015 Identification of a New Susceptibility Locus for Systemic Lupus Erythematosus on Chromosome 12 in Individuals of European Ancestry. *Arthritis Rheumatol*.
- Fernando, M.M., J. Freudenberg, A. Lee, D.L. Morris, L. Boteva *et al.*, 2012 Transancestral mapping of the MHC region in systemic lupus erythematosus identifies new independent and interacting loci at MSH5, HLA-DPB1 and HLA-G. *Ann Rheum Dis* 71 (5):777-784.
- Gateva, V., J.K. Sandling, G. Hom, K.E. Taylor, S.A. Chung *et al.*, 2009 A large-scale replication study identifies TNIP1, PRDM1, JAZF1, UHRF1BP1 and IL10 as risk loci for systemic lupus erythematosus. *Nat Genet* 41 (11):1228-1233.
- Graham, R.R., C. Cotsapas, L. Davies, R. Hackett, C.J. Lessard *et al.*, 2008 Genetic variants near TNFAIP3 on 6q23 are associated with systemic lupus erythematosus. *Nat Genet* 40 (9):1059-1061.
- Han, J.W., H.F. Zheng, Y. Cui, L.D. Sun, D.Q. Ye *et al.*, 2009 Genome-wide association study in a Chinese Han population identifies nine new susceptibility loci for systemic lupus erythematosus. *Nat Genet* 41 (11):1234-1237.
- Hom, G., R.R. Graham, B. Modrek, K.E. Taylor, W. Ortmann *et al.*, 2008 Association of systemic lupus erythematosus with C8orf13-BLK and ITGAM-ITGAX. *N Engl J Med* 358 (9):900-909.
- International Consortium for Systemic Lupus Erythematosus, G., J.B. Harley, M.E. Alarcon-Riquelme, L.A. Criswell, C.O. Jacob *et al.*, 2008 Genome-wide association scan in women with systemic lupus erythematosus identifies susceptibility variants in ITGAM, PXX, KIAA1542 and other loci. *Nat Genet* 40 (2):204-210.
- Kariuki, S.N., Y. Ghodke-Puranik, J.M. Dorschner, B.S. Chrabot, J.A. Kelly *et al.*, 2015 Genetic analysis of the pathogenic molecular sub-phenotype interferon-alpha identifies multiple novel loci involved in systemic lupus erythematosus. *Genes Immun* 16 (1):15-23.
- Kozyrev, S.V., A.K. Abelson, J. Wojcik, A. Zaghlool, M.V. Linga Reddy *et al.*, 2008 Functional variants in the B-cell gene BANK1 are associated with systemic lupus erythematosus. *Nat Genet* 40 (2):211-216.
- Lee, Y.H., S.C. Bae, S.J. Choi, J.D. Ji, and G.G. Song, 2012 Genome-wide pathway analysis of genome-wide association studies on systemic lupus erythematosus and rheumatoid arthritis. *Mol Biol Rep* 39 (12):10627-10635.
- Lessard, C.J., I. Adrianto, J.A. Ice, G.B. Wiley, J.A. Kelly *et al.*, 2012 Identification of IRF8, TMEM39A, and IKZF3-ZPBP2 as susceptibility loci for systemic lupus erythematosus in a large-scale multiracial replication study. *Am J Hum Genet* 90 (4):648-660.

- Lessard, C.J., I. Adrianto, J.A. Kelly, K.M. Kaufman, K.M. Grundahl *et al.*, 2011 Identification of a systemic lupus erythematosus susceptibility locus at 11p13 between PDHX and CD44 in a multiethnic study. *Am J Hum Genet* 88 (1):83-91.
- Li, Y., H. Cheng, X.B. Zuo, Y.J. Sheng, F.S. Zhou *et al.*, 2013 Association analyses identifying two common susceptibility loci shared by psoriasis and systemic lupus erythematosus in the Chinese Han population. *J Med Genet* 50 (12):812-818.
- Martin, J.E., S. Assassi, L.M. Diaz-Gallo, J.C. Broen, C.P. Simeon *et al.*, 2013 A systemic sclerosis and systemic lupus erythematosus pan-meta-GWAS reveals new shared susceptibility loci. *Hum Mol Genet* 22 (19):4021-4029.
- Sheng, Y.J., J.P. Gao, J. Li, J.W. Han, Q. Xu *et al.*, 2011 Follow-up study identifies two novel susceptibility loci PRKCB and 8p11.21 for systemic lupus erythematosus. *Rheumatology (Oxford)* 50 (4):682-688.
- Sheng, Y.J., J.H. Xu, Y.G. Wu, X.B. Zuo, J.P. Gao *et al.*, 2015 Association analyses confirm five susceptibility loci for systemic lupus erythematosus in the Han Chinese population. *Arthritis Res Ther* 17:85.
- Suarez-Gestal, M., M. Calaza, E. Endreffy, R. Pullmann, J. Ordi-Ros *et al.*, 2009 Replication of recently identified systemic lupus erythematosus genetic associations: a case-control study. *Arthritis Res Ther* 11 (3):R69.
- Sun, C., J.E. Molineros, L.L. Looger, X.J. Zhou, K. Kim *et al.*, 2016 High-density genotyping of immune-related loci identifies new SLE risk variants in individuals with Asian ancestry. *Nat Genet* 48 (3):323-330.
- Vaughn, S.E., C. Foley, X. Lu, Z.H. Patel, E.E. Zoller *et al.*, 2014 Lupus risk variants in the PXX locus alter B-cell receptor internalization. *Front Genet* 5:450.
- Yang, J., W. Yang, N. Hirankarn, D.Q. Ye, Y. Zhang *et al.*, 2011 ELF1 is associated with systemic lupus erythematosus in Asian populations. *Hum Mol Genet* 20 (3):601-607.
- Yang, W., P. Ng, M. Zhao, N. Hirankarn, C.S. Lau *et al.*, 2009 Population differences in SLE susceptibility genes: STAT4 and BLK, but not PXX, are associated with systemic lupus erythematosus in Hong Kong Chinese. *Genes Immun* 10 (3):219-226.
- Yang, W., N. Shen, D.Q. Ye, Q. Liu, Y. Zhang *et al.*, 2010 Genome-wide association study in Asian populations identifies variants in ETS1 and WDFY4 associated with systemic lupus erythematosus. *PLoS Genet* 6 (2):e1000841.
- Yang, W., H. Tang, Y. Zhang, X. Tang, J. Zhang *et al.*, 2013 Meta-analysis followed by replication identifies loci in or near CDKN1B, TET3, CD80, DRAM1, and ARID5B as associated with systemic lupus erythematosus in Asians. *Am J Hum Genet* 92 (1):41-51.
- Yu, Z.Y., W.S. Lu, X.B. Zuo, J. Hu, S. Yao *et al.*, 2013 One novel susceptibility locus associate with systemic lupus erythematosus in Chinese Han population. *Rheumatol Int* 33 (8):2079-2083.
- Zhang, J., L. Zhang, Y. Zhang, J. Yang, M. Guo *et al.*, 2015a Gene-Based Meta-Analysis of Genome-Wide Association Study Data Identifies Independent Single-Nucleotide Polymorphisms in ANXA6 as Being Associated With Systemic Lupus Erythematosus in Asian Populations. *Arthritis Rheumatol* 67 (11):2966-2977.
- Zhang, J., Y. Zhang, J. Yang, L. Zhang, L. Sun *et al.*, 2014 Three SNPs in chromosome 11q23.3 are independently associated with systemic lupus erythematosus in Asians. *Hum Mol Genet* 23 (2):524-533.
- Zhang, Y., Y.F. Wang, J. Yang, J. Zhang, L. Sun *et al.*, 2015b Meta-analysis of two Chinese populations identifies an autoimmune disease risk allele in 22q11.21 as associated with systemic lupus erythematosus. *Arthritis Res Ther* 17:67.
- Zhang, Y., J. Yang, J. Zhang, L. Sun, N. Hirankarn *et al.*, 2015c Genome-wide search followed by replication reveals genetic interaction of CD80 and ALOX5AP associated with systemic lupus erythematosus in Asian

populations. *Ann Rheum Dis*.

Zhang, Z., Y. Cheng, X. Zhou, Y. Li, J. Gao *et al.*, 2011 Polymorphisms at 16p13 are associated with systemic lupus erythematosus in the Chinese population. *J Med Genet* 48 (1):69-72.

Zhou, X.J., X.L. Lu, J.C. Lv, H.Z. Yang, L.X. Qin *et al.*, 2011 Genetic association of PRDM1-ATG5 intergenic region and autophagy with systemic lupus erythematosus in a Chinese population. *Ann Rheum Dis* 70 (7):1330-1337.
