# Supplementary material for: Several Critical Cell Types, Tissues, and Pathways Are Implicated in Genome-Wide Association Studies for Systemic Lupus Erythematosus
Source: PubMed Central journal article supplement (PMC4889647; doi:10.1534/g3.116.027326), 2016-03-23
Supplement: supp_g3.116.027326_TableS4.pdf [file supp_g3.116.027326_TableS4.pdf]

**Table S4.** The tissue enrichment of SLE implicated genes within 79 tissues expression matrix in homo-sapiens. *The cells filled in yellow mean the P values passing the Bonferroni-corrected significance criteria ( $P \leq 6.33 \times 10^{-4}$ ).*

| Cells                    | Eastern Asian | Caucasian | Caucasian<br>without HLA region |
|--------------------------|---------------|-----------|---------------------------------|
| Whole_Blood              | 3.78E-03      | 3.30E-05  | 4.15E-05                        |
| PB-BDCA4+Dentritic_cells | 7.63E-04      | 3.00E-06  | 1.00E-06                        |
| PB-CD56+NK_cells         | 8.30E-05      | 3.62E-04  | 5.09E-04                        |
| PB-CD4+T_cells           | 7.57E-05      | 8.38E-03  | 6.82E-03                        |
| PB-CD8+T_cells           | 3.32E-04      | 6.98E-03  | 3.94E-03                        |
| PB-CD19+B_cells          | 1.00E-06      | 1.37E-03  | 3.31E-03                        |
